# Supplementary material
Source: Springer Nature journal article supplement (https://www.springermedizin.de/resource/supplementary/13048_2012_96_MOESM1_ESM.pdf/9664886)

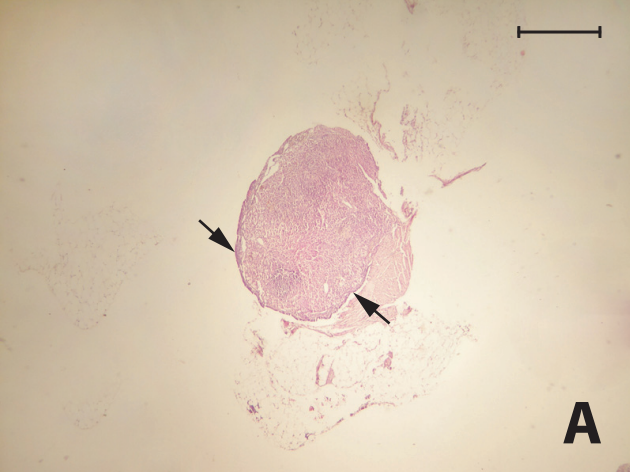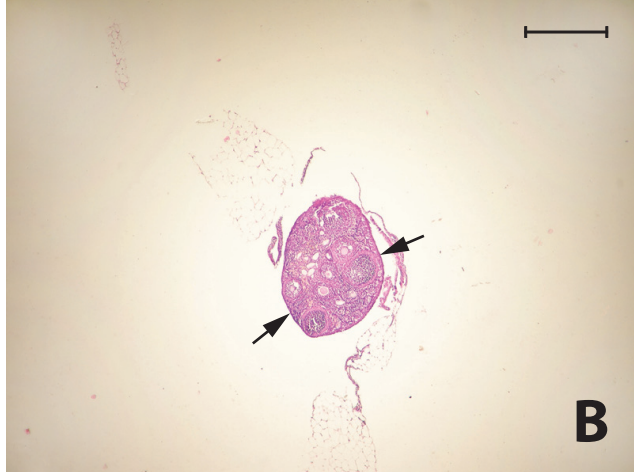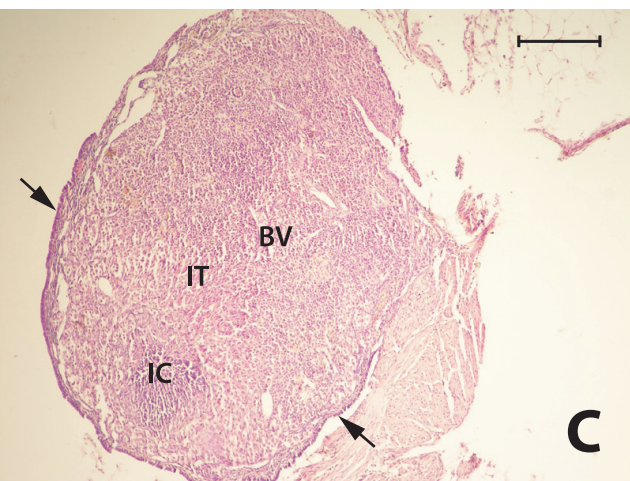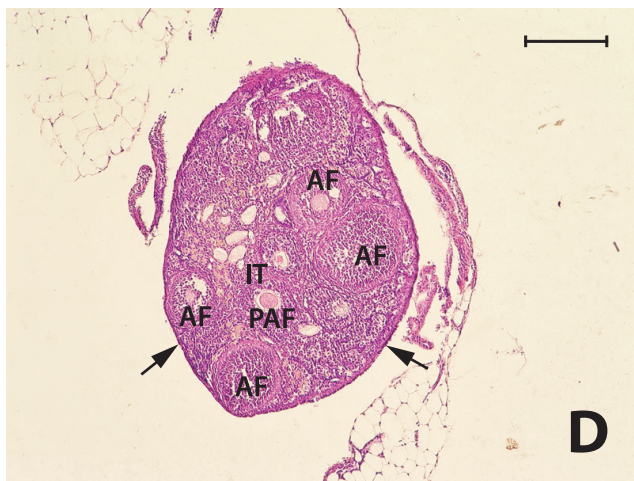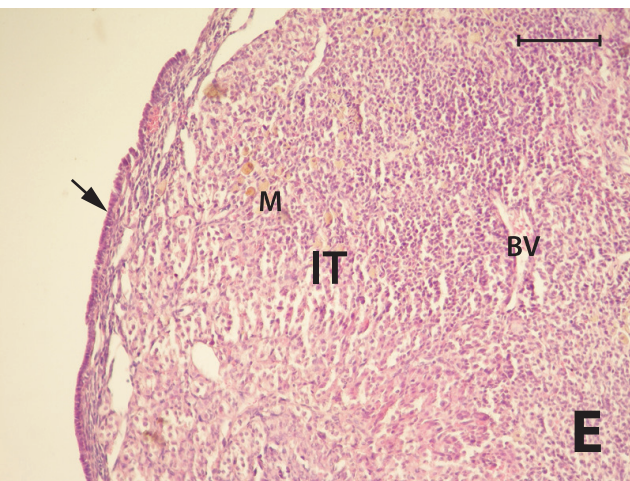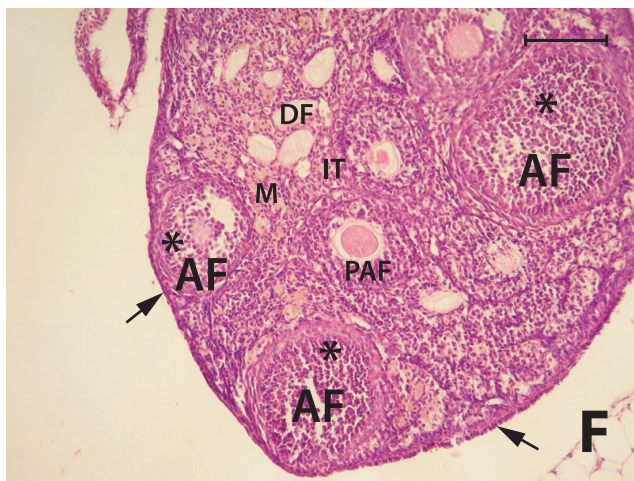

Supplement: MOESM1 [file 9664886]
